# Supplementary material for: Comparison of Oral Microbial Composition and Determinants Encoding Antimicrobial Resistance in Dogs and Their Owners
Source: MDPI journal article supplement (doi:10.3390/antibiotics12101554), 2023-10-20
Supplement: s1 [file s1]

Table S1. Bacterial species detected in oral cavity of dogs and their owners

| Legend | Taxonomy                                                                                                                      | Humans (H) % | Dogs (HA) % |
|--------|-------------------------------------------------------------------------------------------------------------------------------|--------------|-------------|
|        | d_Archaea;p_Methanobacteriota;o_Methanobacteriales;f_Methanobacteriaceae;g_Methanobrevibacter_A;s_Methanobrevibacter_A oralis | 0.0%         | 0.4%        |
|        | d_Bacteria;p_Actinobacteriota;o_Actinomycetales;f_Actinomycetaceae;g_Actinomyces;s_Actinomyces bowdenii                       | 0.0%         | 0.4%        |
|        | d_Bacteria;p_Actinobacteriota;o_Actinomycetales;f_Actinomycetaceae;g_Actinomyces;s_Actinomyces bowdenii B                     | 0.0%         | 0.1%        |
|        | d_Bacteria;p_Actinobacteriota;o_Actinomycetales;f_Actinomycetaceae;g_Actinomyces;s_Actinomyces dentalis                       | 0.2%         | 0.0%        |
|        | d_Bacteria;p_Actinobacteriota;o_Actinomycetales;f_Actinomycetaceae;g_Actinomyces;s_Actinomyces gerencseriae                   | 0.7%         | 0.0%        |
|        | d_Bacteria;p_Actinobacteriota;o_Actinomycetales;f_Actinomycetaceae;g_Actinomyces;s_Actinomyces israelii                       | 0.1%         | 0.0%        |
|        | d_Bacteria;p_Actinobacteriota;o_Actinomycetales;f_Actinomycetaceae;g_Actinomyces;s_Actinomyces johnsonii                      | 0.3%         | 0.0%        |
|        | d_Bacteria;p_Actinobacteriota;o_Actinomycetales;f_Actinomycetaceae;g_Actinomyces;s_Actinomyces massiliensis                   | 4.0%         | 0.0%        |
|        | d_Bacteria;p_Actinobacteriota;o_Actinomycetales;f_Actinomycetaceae;g_Actinomyces;s_Actinomyces naeslundii                     | 2.2%         | 0.0%        |
|        | d_Bacteria;p_Actinobacteriota;o_Actinomycetales;f_Actinomycetaceae;g_Actinomyces;s_Actinomyces oris                           | 9.8%         | 0.0%        |
|        | d_Bacteria;p_Actinobacteriota;o_Actinomycetales;f_Actinomycetaceae;g_Actinomyces;s_Actinomyces oris A                         | 2.1%         | 0.0%        |
|        | d_Bacteria;p_Actinobacteriota;o_Actinomycetales;f_Actinomycetaceae;g_Actinomyces;s_Actinomyces oris C                         | 0.1%         | 0.0%        |
|        | d_Bacteria;p_Actinobacteriota;o_Actinomycetales;f_Actinomycetaceae;g_Actinomyces;s_Actinomyces oris D                         | 0.0%         | 0.0%        |
|        | d_Bacteria;p_Actinobacteriota;o_Actinomycetales;f_Actinomycetaceae;g_Actinomyces;s_Actinomyces oris E                         | 0.5%         | 0.0%        |
|        | d_Bacteria;p_Actinobacteriota;o_Actinomycetales;f_Actinomycetaceae;g_Actinomyces;s_Actinomyces sp000195595                    | 0.8%         | 0.0%        |
|        | d_Bacteria;p_Actinobacteriota;o_Actinomycetales;f_Actinomycetaceae;g_Actinomyces;s_Actinomyces sp000220835                    | 7.1%         | 0.0%        |
|        | d_Bacteria;p_Actinobacteriota;o_Actinomycetales;f_Actinomycetaceae;g_Actinomyces;s_Actinomyces sp001278845                    | 0.0%         | 0.0%        |
|        | d_Bacteria;p_Actinobacteriota;o_Actinomycetales;f_Actinomycetaceae;g_Actinomyces;s_Actinomyces sp00299235                     | 0.2%         | 0.0%        |
|        | d_Bacteria;p_Actinobacteriota;o_Actinomycetales;f_Actinomycetaceae;g_Actinomyces;s_Actinomyces sp900323545                    | 0.0%         | 0.0%        |
|        | d_Bacteria;p_Actinobacteriota;o_Actinomycetales;f_Actinomycetaceae;g_Actinomyces;s_Actinomyces weissii                        | 0.0%         | 1.1%        |
|        | d_Bacteria;p_Actinobacteriota;o_Actinomycetales;f_Actinomycetaceae;g_Buchananella;s_Buchananella hordeovulneris               | 0.0%         | 0.9%        |
|        | d_Bacteria;p_Actinobacteriota;o_Actinomycetales;f_Actinomycetaceae;g_Pauljensenia;s_Pauljensenia canis                        | 0.0%         | 1.9%        |
|        | d_Bacteria;p_Actinobacteriota;o_Actinomycetales;f_Actinomycetaceae;g_Pauljensenia;s_Pauljensenia hongkongensis                | 0.6%         | 0.0%        |
|        | d_Bacteria;p_Actinobacteriota;o_Actinomycetales;f_Actinomycetaceae;g_Pauljensenia;s_Pauljensenia meyeri                       | 0.0%         | 0.0%        |
|        | d_Bacteria;p_Actinobacteriota;o_Actinomycetales;f_Actinomycetaceae;g_Pauljensenia;s_Pauljensenia odontolytica A               | 4.3%         | 0.0%        |
|        | d_Bacteria;p_Actinobacteriota;o_Actinomycetales;f_Actinomycetaceae;g_Pauljensenia;s_Pauljensenia sp000185285                  | 0.1%         | 0.0%        |
|        | d_Bacteria;p_Actinobacteriota;o_Actinomycetales;f_Actinomycetaceae;g_Pauljensenia;s_Pauljensenia sp000278725                  | 0.0%         | 0.0%        |
|        | d_Bacteria;p_Actinobacteriota;o_Actinomycetales;f_Actinomycetaceae;g_Pauljensenia;s_Pauljensenia sp903645355                  | 0.0%         | 0.2%        |
|        | d_Bacteria;p_Actinobacteriota;o_Actinomycetales;f_Actinomycetaceae;g_Peptidiphaga;s_Peptidiphaga gingivicola                  | 0.1%         | 0.0%        |
|        | d_Bacteria;p_Actinobacteriota;o_Actinomycetales;f_Actinomycetaceae;g_Peptidiphaga;s_Peptidiphaga sp000466165                  | 2.8%         | 0.0%        |
|        | d_Bacteria;p_Actinobacteriota;o_Actinomycetales;f_Microbacteriaceae;g_Canibacter;s_Canibacter oris                            | 0.0%         | 0.0%        |
|        | d_Bacteria;p_Actinobacteriota;o_Actinomycetales;f_Microbacteriaceae;g_Canibacter;s_Canibacter sp003859945                     | 0.0%         | 1.0%        |
|        | d_Bacteria;p_Actinobacteriota;o_Actinomycetales;f_Micrococcaceae;g_Rothia;s_Rothia aeria                                      | 1.2%         | 0.0%        |
|        | d_Bacteria;p_Actinobacteriota;o_Actinomycetales;f_Micrococcaceae;g_Rothia;s_Rothia dentocariosa                               | 2.3%         | 0.0%        |
|        | d_Bacteria;p_Actinobacteriota;o_Actinomycetales;f_Micrococcaceae;g_Rothia;s_Rothia mucilaginoso                               | 0.5%         | 0.0%        |
|        | d_Bacteria;p_Actinobacteriota;o_Actinomycetales;f_Micrococcaceae;g_Rothia;s_Rothia sp001808955                                | 0.0%         | 0.0%        |

|                                                                                                                     |      |       |
|---------------------------------------------------------------------------------------------------------------------|------|-------|
| d_Bacteria;p_Actinobacteriota;o_Coriobacteriales;f_Atopobiaceae;g_Olsenella_F;s_Olsenella_F sp001189515             | 0.1% | 0.0%  |
| d_Bacteria;p_Actinobacteriota;o_Coriobacteriales;f_Atopobiaceae;g_RUG721;s_RUG721 sp004010535                       | 0.0% | 0.1%  |
| d_Bacteria;p_Actinobacteriota;o_Mycobacteriales;f_Mycobacteriaceae;g_Corynebacterium;s_Corynebacterium canis        | 0.0% | 11.4% |
| d_Bacteria;p_Actinobacteriota;o_Mycobacteriales;f_Mycobacteriaceae;g_Corynebacterium;s_Corynebacterium durum        | 0.2% | 0.0%  |
| d_Bacteria;p_Actinobacteriota;o_Mycobacteriales;f_Mycobacteriaceae;g_Corynebacterium;s_Corynebacterium freiburgense | 0.0% | 2.9%  |
| d_Bacteria;p_Actinobacteriota;o_Mycobacteriales;f_Mycobacteriaceae;g_Corynebacterium;s_Corynebacterium matruchotii  | 1.2% | 0.0%  |
| d_Bacteria;p_Actinobacteriota;o_Mycobacteriales;f_Mycobacteriaceae;g_Corynebacterium;s_Corynebacterium mustelae     | 0.0% | 0.6%  |
| d_Bacteria;p_Actinobacteriota;o_Propionibacteriales;f_Propionibacteriaceae;g_Arachnia;s_Arachnia propionica         | 0.3% | 0.0%  |
| d_Bacteria;p_Actinobacteriota;o_Propionibacteriales;f_Propionibacteriaceae;g_Arachnia;s_Arachnia propionica B       | 0.0% | 1.1%  |
| d_Bacteria;p_Actinobacteriota;o_Propionibacteriales;f_Propionibacteriaceae;g_Arachnia;s_Arachnia propionica C       | 0.0% | 0.4%  |
| d_Bacteria;p_Actinobacteriota;o_Propionibacteriales;f_Propionibacteriaceae;g_Arachnia;s_Arachnia rubra              | 0.6% | 0.0%  |
| d_Bacteria;p_Actinobacteriota;o_Propionibacteriales;f_Propionibacteriaceae;g_Arachnia;s_Arachnia sp003932855        | 0.0% | 2.5%  |
| d_Bacteria;p_Actinobacteriota;o_Propionibacteriales;f_Propionibacteriaceae;g_Arachnia;s_Arachnia sp900607225        | 0.1% | 0.0%  |
| d_Bacteria;p_Actinobacteriota;o_Propionibacteriales;f_Propionibacteriaceae;g_Arachnia;s_Arachnia sp905372155        | 0.0% | 0.0%  |
| d_Bacteria;p_Bacteroidota;o_Bacteroidales;f_Bacteroidaceae;g_Alloprevotella;s_Alloprevotella sp003859795            | 0.0% | 0.4%  |
| d_Bacteria;p_Bacteroidota;o_Bacteroidales;f_Bacteroidaceae;g_Alloprevotella;s_Alloprevotella sp015259235            | 0.5% | 0.0%  |
| d_Bacteria;p_Bacteroidota;o_Bacteroidales;f_Bacteroidaceae;g_Alloprevotella;s_Alloprevotella sp900095835            | 0.1% | 0.0%  |
| d_Bacteria;p_Bacteroidota;o_Bacteroidales;f_Bacteroidaceae;g_Alloprevotella;s_Alloprevotella sp905371275            | 0.0% | 0.0%  |
| d_Bacteria;p_Bacteroidota;o_Bacteroidales;f_Bacteroidaceae;g_Bacteroides;s_Bacteroides heparinolyticus              | 0.0% | 0.1%  |
| d_Bacteria;p_Bacteroidota;o_Bacteroidales;f_Bacteroidaceae;g_Prevotella;s_Prevotella conceptionensis                | 0.1% | 0.0%  |
| d_Bacteria;p_Bacteroidota;o_Bacteroidales;f_Bacteroidaceae;g_Prevotella;s_Prevotella denticola                      | 0.0% | 0.0%  |
| d_Bacteria;p_Bacteroidota;o_Bacteroidales;f_Bacteroidaceae;g_Prevotella;s_Prevotella loeschei                       | 0.0% | 0.0%  |
| d_Bacteria;p_Bacteroidota;o_Bacteroidales;f_Bacteroidaceae;g_Prevotella;s_Prevotella melaninogenica                 | 0.3% | 0.0%  |
| d_Bacteria;p_Bacteroidota;o_Bacteroidales;f_Bacteroidaceae;g_Prevotella;s_Prevotella melaninogenica B               | 0.1% | 0.0%  |
| d_Bacteria;p_Bacteroidota;o_Bacteroidales;f_Bacteroidaceae;g_Prevotella;s_Prevotella melaninogenica C               | 0.0% | 0.0%  |
| d_Bacteria;p_Bacteroidota;o_Bacteroidales;f_Bacteroidaceae;g_Prevotella;s_Prevotella nigrescens                     | 0.4% | 0.0%  |
| d_Bacteria;p_Bacteroidota;o_Bacteroidales;f_Bacteroidaceae;g_Prevotella;s_Prevotella oris                           | 0.0% | 0.0%  |
| d_Bacteria;p_Bacteroidota;o_Bacteroidales;f_Bacteroidaceae;g_Prevotella;s_Prevotella oulorum                        | 0.1% | 0.0%  |
| d_Bacteria;p_Bacteroidota;o_Bacteroidales;f_Bacteroidaceae;g_Prevotella;s_Prevotella salivae                        | 0.0% | 0.0%  |
| d_Bacteria;p_Bacteroidota;o_Bacteroidales;f_Bacteroidaceae;g_Prevotella;s_Prevotella sp000163055                    | 0.0% | 0.0%  |
| d_Bacteria;p_Bacteroidota;o_Bacteroidales;f_Bacteroidaceae;g_Prevotella;s_Prevotella sp000257925                    | 0.0% | 0.0%  |
| d_Bacteria;p_Bacteroidota;o_Bacteroidales;f_Bacteroidaceae;g_Prevotella;s_Prevotella sp000467895                    | 0.1% | 0.0%  |
| d_Bacteria;p_Bacteroidota;o_Bacteroidales;f_Bacteroidaceae;g_Prevotella;s_Prevotella sp003932845                    | 0.0% | 0.2%  |
| d_Bacteria;p_Bacteroidota;o_Bacteroidales;f_Bacteroidaceae;g_Prevotella;s_Prevotella veroralis                      | 0.1% | 0.0%  |
| d_Bacteria;p_Bacteroidota;o_Bacteroidales;f_Paludibacteraceae;g_F0058;s_F0058 sp000768855                           | 0.0% | 1.2%  |
| d_Bacteria;p_Bacteroidota;o_Bacteroidales;f_Paludibacteraceae;g_H1;s_H1 sp001653155                                 | 0.0% | 0.6%  |
| d_Bacteria;p_Bacteroidota;o_Bacteroidales;f_Porphyromonadaceae;g_Porphyromonas;s_Porphyromonas catoniae             | 0.1% | 0.0%  |
| d_Bacteria;p_Bacteroidota;o_Bacteroidales;f_Porphyromonadaceae;g_Porphyromonas;s_Porphyromonas crevioricanis        | 0.0% | 0.6%  |
| d_Bacteria;p_Bacteroidota;o_Bacteroidales;f_Porphyromonadaceae;g_Porphyromonas;s_Porphyromonas gingivalis           | 0.0% | 0.2%  |

|                                                                                                                         |      |       |
|-------------------------------------------------------------------------------------------------------------------------|------|-------|
| d_Bacteria;p_Bacteroidota;o_Bacteroidales;f_Porphyromonadaceae;g_Porphyromonas;s_Porphyromonas gingivicanis             | 0.0% | 3.6%  |
| d_Bacteria;p_Bacteroidota;o_Bacteroidales;f_Porphyromonadaceae;g_Porphyromonas;s_Porphyromonas gulae                    | 0.0% | 14.6% |
| d_Bacteria;p_Bacteroidota;o_Bacteroidales;f_Porphyromonadaceae;g_Porphyromonas;s_Porphyromonas macacae                  | 0.0% | 0.5%  |
| d_Bacteria;p_Bacteroidota;o_Bacteroidales;f_Porphyromonadaceae;g_Porphyromonas;s_Porphyromonas pasteri                  | 0.4% | 0.0%  |
| d_Bacteria;p_Bacteroidota;o_Bacteroidales;f_Porphyromonadaceae;g_Porphyromonas;s_Porphyromonas sp000467855              | 0.0% | 0.0%  |
| d_Bacteria;p_Bacteroidota;o_Bacteroidales;f_Porphyromonadaceae;g_Porphyromonas;s_Porphyromonas sp000768875              | 0.0% | 0.6%  |
| d_Bacteria;p_Bacteroidota;o_Bacteroidales;f_Porphyromonadaceae;g_Porphyromonas;s_Porphyromonas sp000769075              | 0.0% | 1.7%  |
| d_Bacteria;p_Bacteroidota;o_Bacteroidales;f_Porphyromonadaceae;g_Porphyromonas_A;s_Porphyromonas A cangingivalis        | 0.0% | 8.1%  |
| d_Bacteria;p_Bacteroidota;o_Bacteroidales;f_Porphyromonadaceae;g_Porphyromonas_A;s_Porphyromonas A canoris              | 0.0% | 5.6%  |
| d_Bacteria;p_Bacteroidota;o_Bacteroidales;f_Tannerellaceae;g_Tannerella;s_Tannerella forsythia                          | 0.0% | 0.1%  |
| d_Bacteria;p_Bacteroidota;o_Bacteroidales;f_Tannerellaceae;g_Tannerella;s_Tannerella forsythia A                        | 0.0% | 4.7%  |
| d_Bacteria;p_Bacteroidota;o_Bacteroidales;f_Tannerellaceae;g_Tannerella;s_Tannerella sp003033925                        | 0.3% | 0.0%  |
| d_Bacteria;p_Bacteroidota;o_Flavobacteriales;f_Flavobacteriaceae;g_Capnocytophaga;s_Capnocytophaga canimorsus           | 0.0% | 0.5%  |
| d_Bacteria;p_Bacteroidota;o_Flavobacteriales;f_Flavobacteriaceae;g_Capnocytophaga;s_Capnocytophaga canis                | 0.0% | 1.4%  |
| d_Bacteria;p_Bacteroidota;o_Flavobacteriales;f_Flavobacteriaceae;g_Capnocytophaga;s_Capnocytophaga cynodegmi            | 0.0% | 1.5%  |
| d_Bacteria;p_Bacteroidota;o_Flavobacteriales;f_Flavobacteriaceae;g_Capnocytophaga;s_Capnocytophaga endodontalis         | 0.1% | 0.0%  |
| d_Bacteria;p_Bacteroidota;o_Flavobacteriales;f_Flavobacteriaceae;g_Capnocytophaga;s_Capnocytophaga gingivalis           | 0.1% | 0.0%  |
| d_Bacteria;p_Bacteroidota;o_Flavobacteriales;f_Flavobacteriaceae;g_Capnocytophaga;s_Capnocytophaga granulosa            | 0.0% | 0.0%  |
| d_Bacteria;p_Bacteroidota;o_Flavobacteriales;f_Flavobacteriaceae;g_Capnocytophaga;s_Capnocytophaga leadbetteri          | 0.4% | 0.0%  |
| d_Bacteria;p_Bacteroidota;o_Flavobacteriales;f_Flavobacteriaceae;g_Capnocytophaga;s_Capnocytophaga ochracea             | 0.1% | 0.0%  |
| d_Bacteria;p_Bacteroidota;o_Flavobacteriales;f_Flavobacteriaceae;g_Capnocytophaga;s_Capnocytophaga sp905372595          | 0.0% | 0.0%  |
| d_Bacteria;p_Bacteroidota;o_Flavobacteriales;f_Flavobacteriaceae;g_Capnocytophaga;s_Capnocytophaga sputigena            | 0.5% | 0.0%  |
| d_Bacteria;p_Bacteroidota;o_Flavobacteriales;f_Weeksellaceae;g_Bergeyella;s_Bergeyella zoohelcum                        | 0.0% | 1.7%  |
| d_Bacteria;p_Bacteroidota;o_Flavobacteriales;f_Weeksellaceae;g_JABCPE02;s_JABCPE02 sp013333255                          | 0.1% | 0.0%  |
| d_Bacteria;p_Bacteroidota;o_Flavobacteriales;f_Weeksellaceae;g_JABCPE02;s_JABCPE02 sp013333875                          | 0.1% | 0.0%  |
| d_Bacteria;p_Campylobacterota;o_Campylobacteriales;f_Campylobacteraceae;g_Campylobacter_A;s_Campylobacter A concisus AC | 0.0% | 0.0%  |
| d_Bacteria;p_Campylobacterota;o_Campylobacteriales;f_Campylobacteraceae;g_Campylobacter_A;s_Campylobacter A concisus B  | 0.0% | 0.0%  |
| d_Bacteria;p_Campylobacterota;o_Campylobacteriales;f_Campylobacteraceae;g_Campylobacter_A;s_Campylobacter A curvus      | 0.0% | 0.0%  |
| d_Bacteria;p_Campylobacterota;o_Campylobacteriales;f_Campylobacteraceae;g_Campylobacter_A;s_Campylobacter A sp004803855 | 0.0% | 0.1%  |
| d_Bacteria;p_Campylobacterota;o_Campylobacteriales;f_Campylobacteraceae;g_Campylobacter_A;s_Campylobacter A sp012978815 | 0.0% | 0.9%  |
| d_Bacteria;p_Campylobacterota;o_Campylobacteriales;f_Campylobacteraceae;g_Campylobacter_A;s_Campylobacter A sp013201975 | 0.0% | 0.8%  |
| d_Bacteria;p_Desulfobacterota;o_Desulfobulbales;f_Desulfobulbaceae;g_Desulfobulbus;s_Desulfobulbus oralis               | 0.0% | 0.1%  |
| d_Bacteria;p_Desulfobacterota;o_Desulfobulbales;f_Desulfobulbaceae;g_Desulfobulbus;s_Desulfobulbus oralis               | 0.0% | 1.4%  |
| d_Bacteria;p_Desulfobacterota;o_Desulfobulbales;f_Desulfobulbaceae;g_Desulfobulbus;s_Desulfobulbus oralis               | 0.0% | 0.8%  |
| d_Bacteria;p_Firmicutes;o_Erysipelotrichales;f_Erysipelotrichaceae;g_Bulleidia;s_Bulleidia moorei                       | 0.0% | 0.0%  |
| d_Bacteria;p_Firmicutes;o_Erysipelotrichales;f_Erysipelotrichaceae;g_RQZE01;s_RQZE01 sp003858585                        | 0.0% | 0.9%  |
| d_Bacteria;p_Firmicutes;o_Lactobacillales;f_Aerococcaceae;g_Abiotrophia;s_Abiotrophia defectiva                         | 0.0% | 0.0%  |
| d_Bacteria;p_Firmicutes;o_Lactobacillales;f_Aerococcaceae;g_Granulicatella;s_Granulicatella adiacens                    | 1.3% | 0.0%  |
| d_Bacteria;p_Firmicutes;o_Lactobacillales;f_Aerococcaceae;g_Granulicatella;s_Granulicatella elegans                     | 0.1% | 0.0%  |







|                                                                                                                             |      |      |
|-----------------------------------------------------------------------------------------------------------------------------|------|------|
| d_Bacteria;p_Firmicutes;o_Lactobacillales;f_Streptococcaceae;g_Streptococcus;s_Streptococcus vestibularis                   | 0.9% | 0.0% |
| d_Bacteria;p_Firmicutes;o_Lactobacillales;f_Streptococcaceae;g_Streptococcus;s_Streptococcus xiaochunlingii                 | 0.2% | 0.0% |
| d_Bacteria;p_Firmicutes;o_Staphylococcales;f_Gemellaceae;g_Gemella;s_Gemella haemolysans                                    | 0.1% | 0.0% |
| d_Bacteria;p_Firmicutes;o_Staphylococcales;f_Gemellaceae;g_Gemella;s_Gemella haemolysans A                                  | 0.1% | 0.0% |
| d_Bacteria;p_Firmicutes;o_Staphylococcales;f_Gemellaceae;g_Gemella;s_Gemella haemolysans B                                  | 0.2% | 0.0% |
| d_Bacteria;p_Firmicutes;o_Staphylococcales;f_Gemellaceae;g_Gemella;s_Gemella haemolysans C                                  | 0.1% | 0.0% |
| d_Bacteria;p_Firmicutes;o_Staphylococcales;f_Gemellaceae;g_Gemella;s_Gemella morbillorum                                    | 0.2% | 0.0% |
| d_Bacteria;p_Firmicutes;o_Staphylococcales;f_Gemellaceae;g_Gemella;s_Gemella sp002871655                                    | 0.6% | 0.0% |
| d_Bacteria;p_Firmicutes;o_Staphylococcales;f_Gemellaceae;g_Gemella;s_Gemella sp900766305                                    | 0.2% | 0.0% |
| d_Bacteria;p_Firmicutes_A;o_Lachnospirales;f_Lachnospiraceae;g_Johnsonella;s_Johnsonella sp900766185                        | 0.1% | 0.0% |
| d_Bacteria;p_Firmicutes_A;o_Lachnospirales;f_Lachnospiraceae;g_Lachnoanaerobaculum;s_Lachnoanaerobaculum saburreum          | 0.1% | 0.0% |
| d_Bacteria;p_Firmicutes_A;o_Lachnospirales;f_Lachnospiraceae;g_Lachnoanaerobaculum;s_Lachnoanaerobaculum sp000287675        | 0.0% | 0.0% |
| d_Bacteria;p_Firmicutes_A;o_Lachnospirales;f_Lachnospiraceae;g_Lachnoanaerobaculum;s_Lachnoanaerobaculum sp000296385        | 0.0% | 0.0% |
| d_Bacteria;p_Firmicutes_A;o_Lachnospirales;f_Vallitaleaceae;g_W11650;s_W11650 sp003858485                                   | 0.0% | 0.5% |
| d_Bacteria;p_Firmicutes_A;o_Peptostreptococcales;f_Anaerovoracaceae;g_Eubacterium_M;s_Eubacterium M brachy                  | 0.0% | 0.0% |
| d_Bacteria;p_Firmicutes_A;o_Peptostreptococcales;f_Anaerovoracaceae;g_Mogibacterium;s_Mogibacterium diversum                | 0.0% | 0.0% |
| d_Bacteria;p_Firmicutes_A;o_Peptostreptococcales;f_Filifactoraceae;g_Filifactor;s_Filifactor alocis                         | 0.0% | 0.1% |
| d_Bacteria;p_Firmicutes_A;o_Peptostreptococcales;f_Peptostreptococcaceae;g_Peptostreptococcus;s_Peptostreptococcus canis    | 0.0% | 0.4% |
| d_Bacteria;p_Firmicutes_A;o_Peptostreptococcales;f_Peptostreptococcaceae;g_Peptostreptococcus;s_Peptostreptococcus stomatis | 0.0% | 0.0% |
| d_Bacteria;p_Firmicutes_A;o_TANB77;f_CAG-508;g_CAG-793;s_CAG-793 sp013333035                                                | 0.0% | 0.0% |
| d_Bacteria;p_Firmicutes_A;o_Tissierellales;f_Peptoniphilaceae;g_Parvimonas;s_Parvimonas micra                               | 0.1% | 0.0% |
| d_Bacteria;p_Firmicutes_A;o_Tissierellales;f_Peptoniphilaceae;g_W5053;s_W5053 sp000467935                                   | 0.0% | 0.2% |
| d_Bacteria;p_Firmicutes_C;o_Selenomonadales;f_Selenomonadaceae;g_Centipeda;s_Centipeda artemidis                            | 0.0% | 0.0% |
| d_Bacteria;p_Firmicutes_C;o_Selenomonadales;f_Selenomonadaceae;g_Centipeda;s_Centipeda noxia                                | 0.0% | 0.0% |
| d_Bacteria;p_Firmicutes_C;o_Selenomonadales;f_Selenomonadaceae;g_Centipeda;s_Centipeda sp000468035                          | 0.0% | 0.0% |
| d_Bacteria;p_Firmicutes_C;o_Selenomonadales;f_Selenomonadaceae;g_Centipeda;s_Centipeda sp905372865                          | 0.0% | 0.0% |
| d_Bacteria;p_Firmicutes_C;o_Veillonellales;f_Dialisteraceae;g_Dialister;s_Dialister invisus                                 | 0.0% | 0.0% |
| d_Bacteria;p_Firmicutes_C;o_Veillonellales;f_Megasphaeraceae;g_Anaeroglobus;s_Anaeroglobus micronuciformis                  | 0.0% | 0.0% |
| d_Bacteria;p_Firmicutes_C;o_Veillonellales;f_Veillonellaceae;g_F0422;s_F0422 sp001553345                                    | 0.4% | 0.0% |
| d_Bacteria;p_Firmicutes_C;o_Veillonellales;f_Veillonellaceae;g_F0422;s_F0422 sp003992315                                    | 0.0% | 0.0% |
| d_Bacteria;p_Firmicutes_C;o_Veillonellales;f_Veillonellaceae;g_F0422;s_F0422 sp003999875                                    | 0.1% | 0.0% |
| d_Bacteria;p_Firmicutes_C;o_Veillonellales;f_Veillonellaceae;g_F0422;s_F0422 sp900766245                                    | 0.0% | 0.0% |
| d_Bacteria;p_Firmicutes_C;o_Veillonellales;f_Veillonellaceae;g_Veillonella;s_Veillonella nakazawae                          | 0.0% | 0.0% |
| d_Bacteria;p_Firmicutes_C;o_Veillonellales;f_Veillonellaceae;g_Veillonella;s_Veillonella parvula                            | 0.4% | 0.0% |
| d_Bacteria;p_Firmicutes_C;o_Veillonellales;f_Veillonellaceae;g_Veillonella;s_Veillonella parvula A                          | 4.0% | 0.0% |
| d_Bacteria;p_Firmicutes_C;o_Veillonellales;f_Veillonellaceae;g_Veillonella;s_Veillonella rogosae                            | 0.0% | 0.0% |
| d_Bacteria;p_Firmicutes_C;o_Veillonellales;f_Veillonellaceae;g_Veillonella;s_Veillonella sp900757715                        | 0.0% | 0.0% |
| d_Bacteria;p_Fusobacteriota;o_Fusobacteriales;f_Fusobacteriaceae;g_Fusobacterium;s_Fusobacterium animalis                   | 0.0% | 0.0% |
| d_Bacteria;p_Fusobacteriota;o_Fusobacteriales;f_Fusobacteriaceae;g_Fusobacterium;s_Fusobacterium canifelinum                | 0.0% | 0.1% |

|                                                                                                                   |      |      |
|-------------------------------------------------------------------------------------------------------------------|------|------|
| d_Bacteria;p_Fusobacteriota;o_Fusobacteriales;f_Fusobacteriaceae;g_Fusobacterium;s_Fusobacterium periodonticum D  | 0.0% | 0.0% |
| d_Bacteria;p_Fusobacteriota;o_Fusobacteriales;f_Fusobacteriaceae;g_Fusobacterium;s_Fusobacterium polymorphum      | 1.0% | 0.0% |
| d_Bacteria;p_Fusobacteriota;o_Fusobacteriales;f_Fusobacteriaceae;g_Fusobacterium;s_Fusobacterium russii           | 0.0% | 0.1% |
| d_Bacteria;p_Fusobacteriota;o_Fusobacteriales;f_Leptotrichiaceae;g_Leptotrichia;s_Leptotrichia buccalis           | 0.0% | 0.0% |
| d_Bacteria;p_Fusobacteriota;o_Fusobacteriales;f_Leptotrichiaceae;g_Leptotrichia;s_Leptotrichia hofstadii          | 0.1% | 0.0% |
| d_Bacteria;p_Fusobacteriota;o_Fusobacteriales;f_Leptotrichiaceae;g_Leptotrichia;s_Leptotrichia hongkongensis      | 0.0% | 0.0% |
| d_Bacteria;p_Fusobacteriota;o_Fusobacteriales;f_Leptotrichiaceae;g_Leptotrichia;s_Leptotrichia massiliensis       | 0.0% | 0.0% |
| d_Bacteria;p_Fusobacteriota;o_Fusobacteriales;f_Leptotrichiaceae;g_Leptotrichia;s_Leptotrichia sp013394795        | 0.0% | 0.0% |
| d_Bacteria;p_Fusobacteriota;o_Fusobacteriales;f_Leptotrichiaceae;g_Leptotrichia;s_Leptotrichia wadei              | 0.3% | 0.0% |
| d_Bacteria;p_Fusobacteriota;o_Fusobacteriales;f_Leptotrichiaceae;g_Leptotrichia A;s_Leptotrichia A sp000469505    | 0.0% | 0.0% |
| d_Bacteria;p_Fusobacteriota;o_Fusobacteriales;f_Leptotrichiaceae;g_Leptotrichia A;s_Leptotrichia A sp001274535    | 0.1% | 0.0% |
| d_Bacteria;p_Fusobacteriota;o_Fusobacteriales;f_Leptotrichiaceae;g_Leptotrichia A;s_Leptotrichia A sp905371725    | 0.0% | 0.0% |
| d_Bacteria;p_Fusobacteriota;o_Fusobacteriales;f_Pseudoleptotrichia;s_Pseudoleptotrichia sp003932895               | 0.0% | 0.1% |
| d_Bacteria;p_Patescibacteria;o_Saccharimonadales;f_Nanosynbacteraceae;g_Nanosynbacter;s_Nanosynbacter lyticus     | 0.0% | 0.0% |
| d_Bacteria;p_Patescibacteria;o_Saccharimonadales;f_Saccharimonadaceae;g_Saccharimonas;s_Saccharimonas sp010202265 | 0.0% | 0.0% |
| d_Bacteria;p_Patescibacteria;o_Saccharimonadales;f_Saccharimonadaceae;g_Saccharimonas;s_Saccharimonas sp013333625 | 0.0% | 0.0% |
| d_Bacteria;p_Patescibacteria;o_Saccharimonadales;f_Saccharimonadaceae;g_Saccharimonas;s_Saccharimonas sp013333645 | 0.0% | 0.0% |
| d_Bacteria;p_Patescibacteria;o_Saccharimonadales;f_Saccharimonadaceae;g_Saccharimonas;s_Saccharimonas sp013333795 | 0.0% | 0.0% |
| d_Bacteria;p_Patescibacteria;o_Saccharimonadales;f_Saccharimonadaceae;g_Saccharimonas;s_Saccharimonas sp018127705 | 0.1% | 0.0% |
| d_Bacteria;p_Patescibacteria;o_Saccharimonadales;f_Saccharimonadaceae;g_Saccharimonas;s_Saccharimonas sp905373835 | 0.0% | 0.0% |
| d_Bacteria;p_Patescibacteria;o_Saccharimonadales;f_UBA10027;g_SDRW01;s_SDRW01 sp007845485                         | 0.0% | 0.0% |
| d_Bacteria;p_Proteobacteria;o_Burkholderiales;f_Burkholderiaceae;g_Lampropedia;s_Lampropedia sp002285265          | 0.0% | 0.0% |
| d_Bacteria;p_Proteobacteria;o_Burkholderiales;f_Burkholderiaceae;g_Lampropedia;s_Lampropedia sp002285285          | 0.0% | 2.0% |
| d_Bacteria;p_Proteobacteria;o_Burkholderiales;f_Burkholderiaceae;g_Lampropedia;s_Lampropedia sp003703475          | 0.0% | 7.6% |
| d_Bacteria;p_Proteobacteria;o_Burkholderiales;f_Burkholderiaceae;g_Lautropia;s_Lautropia dentalis                 | 0.1% | 0.0% |
| d_Bacteria;p_Proteobacteria;o_Burkholderiales;f_Burkholderiaceae;g_Lautropia;s_Lautropia mirabilis                | 1.2% | 0.0% |
| d_Bacteria;p_Proteobacteria;o_Burkholderiales;f_Burkholderiaceae;g_Ottowia;s_Ottowia sp001262075                  | 0.0% | 0.0% |
| d_Bacteria;p_Proteobacteria;o_Burkholderiales;f_Burkholderiaceae;g_Ottowia;s_Ottowia sp003859965                  | 0.0% | 0.1% |
| d_Bacteria;p_Proteobacteria;o_Burkholderiales;f_Neisseriaceae;g_Conchiformibius;s_Conchiformibius steedae         | 0.0% | 0.2% |
| d_Bacteria;p_Proteobacteria;o_Burkholderiales;f_Neisseriaceae;g_Eikenella;s_Eikenella corrodens                   | 0.0% | 0.0% |
| d_Bacteria;p_Proteobacteria;o_Burkholderiales;f_Neisseriaceae;g_Eikenella;s_Eikenella shayegani                   | 0.0% | 0.3% |
| d_Bacteria;p_Proteobacteria;o_Burkholderiales;f_Neisseriaceae;g_Kingella B;s_Kingella B oralis                    | 0.1% | 0.0% |
| d_Bacteria;p_Proteobacteria;o_Burkholderiales;f_Neisseriaceae;g_Neisseria;s_Neisseria animaloris                  | 0.0% | 0.2% |
| d_Bacteria;p_Proteobacteria;o_Burkholderiales;f_Neisseriaceae;g_Neisseria;s_Neisseria canis                       | 0.0% | 0.6% |
| d_Bacteria;p_Proteobacteria;o_Burkholderiales;f_Neisseriaceae;g_Neisseria;s_Neisseria cinerea                     | 0.2% | 0.0% |
| d_Bacteria;p_Proteobacteria;o_Burkholderiales;f_Neisseriaceae;g_Neisseria;s_Neisseria dumasiana                   | 0.0% | 1.2% |
| d_Bacteria;p_Proteobacteria;o_Burkholderiales;f_Neisseriaceae;g_Neisseria;s_Neisseria elongata                    | 0.5% | 0.0% |
| d_Bacteria;p_Proteobacteria;o_Burkholderiales;f_Neisseriaceae;g_Neisseria;s_Neisseria mucosa                      | 0.1% | 0.0% |
| d_Bacteria;p_Proteobacteria;o_Burkholderiales;f_Neisseriaceae;g_Neisseria;s_Neisseria mucosa A                    | 3.1% | 0.0% |

|                                                                                                                    |      |      |
|--------------------------------------------------------------------------------------------------------------------|------|------|
| d_Bacteria;p_Proteobacteria;o_Burkholderiales;f_Neisseriaceae;g_Neisseria;s_Neisseria sicca                        | 0.1% | 0.0% |
| d_Bacteria;p_Proteobacteria;o_Burkholderiales;f_Neisseriaceae;g_Neisseria;s_Neisseria sp00090875                   | 0.2% | 0.0% |
| d_Bacteria;p_Proteobacteria;o_Burkholderiales;f_Neisseriaceae;g_Neisseria;s_Neisseria sp000186165                  | 0.0% | 0.0% |
| d_Bacteria;p_Proteobacteria;o_Burkholderiales;f_Neisseriaceae;g_Neisseria;s_Neisseria subflava                     | 0.0% | 0.0% |
| d_Bacteria;p_Proteobacteria;o_Burkholderiales;f_Neisseriaceae;g_Neisseria;s_Neisseria weaveri                      | 0.0% | 0.2% |
| d_Bacteria;p_Proteobacteria;o_Burkholderiales;f_Neisseriaceae;g_Neisseria;s_Neisseria zoodegmatis                  | 0.0% | 0.4% |
| d_Bacteria;p_Proteobacteria;o_Cardiobacteriales;f_Cardiobacteriaceae;g_Cardiobacterium;s_Cardiobacterium hominis   | 0.2% | 0.0% |
| d_Bacteria;p_Proteobacteria;o_Enterobacteriales;f_Pasteurellaceae;g_Aggregatibacter;s_Aggregatibacter aphrophilus  | 0.0% | 0.0% |
| d_Bacteria;p_Proteobacteria;o_Enterobacteriales;f_Pasteurellaceae;g_Aggregatibacter;s_Aggregatibacter segnis_A     | 0.0% | 0.0% |
| d_Bacteria;p_Proteobacteria;o_Enterobacteriales;f_Pasteurellaceae;g_Aggregatibacter;s_Aggregatibacter sp000466335  | 0.1% | 0.0% |
| d_Bacteria;p_Proteobacteria;o_Enterobacteriales;f_Pasteurellaceae;g_Frederiksenia;s_Frederiksenia canicola         | 0.0% | 0.2% |
| d_Bacteria;p_Proteobacteria;o_Enterobacteriales;f_Pasteurellaceae;g_Haemophilus;s_Haemophilus haemolyticus         | 0.2% | 0.0% |
| d_Bacteria;p_Proteobacteria;o_Enterobacteriales;f_Pasteurellaceae;g_Haemophilus;s_Haemophilus seminalis            | 0.3% | 0.0% |
| d_Bacteria;p_Proteobacteria;o_Enterobacteriales;f_Pasteurellaceae;g_Haemophilus_D;s_Haemophilus_D parainfluenzae   | 1.6% | 0.0% |
| d_Bacteria;p_Proteobacteria;o_Enterobacteriales;f_Pasteurellaceae;g_Haemophilus_D;s_Haemophilus_D parainfluenzae M | 1.3% | 0.0% |
| d_Bacteria;p_Proteobacteria;o_Enterobacteriales;f_Pasteurellaceae;g_Haemophilus_D;s_Haemophilus_D parainfluenzae N | 0.2% | 0.0% |
| d_Bacteria;p_Proteobacteria;o_Enterobacteriales;f_Pasteurellaceae;g_Haemophilus_D;s_Haemophilus_D parainfluenzae O | 0.0% | 0.0% |
| d_Bacteria;p_Proteobacteria;o_Enterobacteriales;f_Pasteurellaceae;g_Haemophilus_D;s_Haemophilus_D sp001815355      | 0.0% | 0.0% |
| d_Bacteria;p_Proteobacteria;o_Enterobacteriales;f_Pasteurellaceae;g_Haemophilus_D;s_Haemophilus_D sp900756155      | 0.0% | 0.0% |
| d_Bacteria;p_Proteobacteria;o_Enterobacteriales;f_Pasteurellaceae;g_Haemophilus_D;s_Haemophilus_D sp905215245      | 0.0% | 0.0% |
| d_Bacteria;p_Proteobacteria;o_Enterobacteriales;f_Pasteurellaceae;g_Pasteurella;s_Pasteurella canis                | 0.0% | 0.5% |
| d_Bacteria;p_Proteobacteria;o_Enterobacteriales;f_Pasteurellaceae;g_Pasteurella;s_Pasteurella dagmatis             | 0.0% | 0.1% |
| d_Bacteria;p_Proteobacteria;o_Enterobacteriales;f_Pasteurellaceae;g_Pasteurella;s_Pasteurella multocida_A          | 0.0% | 0.2% |
| d_Bacteria;p_Proteobacteria;o_Pseudomonadales;f_Moraxellaceae;g_Moraxella;s_Moraxella sp002224245                  | 0.0% | 1.7% |
| d_Bacteria;p_Proteobacteria;o_Xanthomonadales;f_Xanthomonadaceae;g_Lysobacter_B;s_Lysobacter_B sp002798195         | 0.0% | 0.2% |
| d_Bacteria;p_Proteobacteria;o_Xanthomonadales;f_Xanthomonadaceae;g_Lysobacter_B;s_Lysobacter_B sp002798275         | 0.0% | 0.1% |
| d_Bacteria;p_Proteobacteria;o_Xanthomonadales;f_Xanthomonadaceae;g_Lysobacter_B;s_Lysobacter_B sp002798295         | 0.0% | 0.4% |
| d_Bacteria;p_Spirochaetota;o_Treponematales;f_Treponemataceae;g_Treponema;s_Treponema sp010365865                  | 0.1% | 0.0% |
| d_Bacteria;p_Synergistota;o_Synergistales;f_Aminobacteriaceae;g_CAJPSE01;s_CAJPSE01 sp003860125                    | 0.0% | 4.4% |
